# Supplementary material
Source: PubMed Central journal article supplement (PMC5113027)

A

Baseline Pediatric OVERALL Performance Categories of Patients Receiving a Tracheostomy Alone

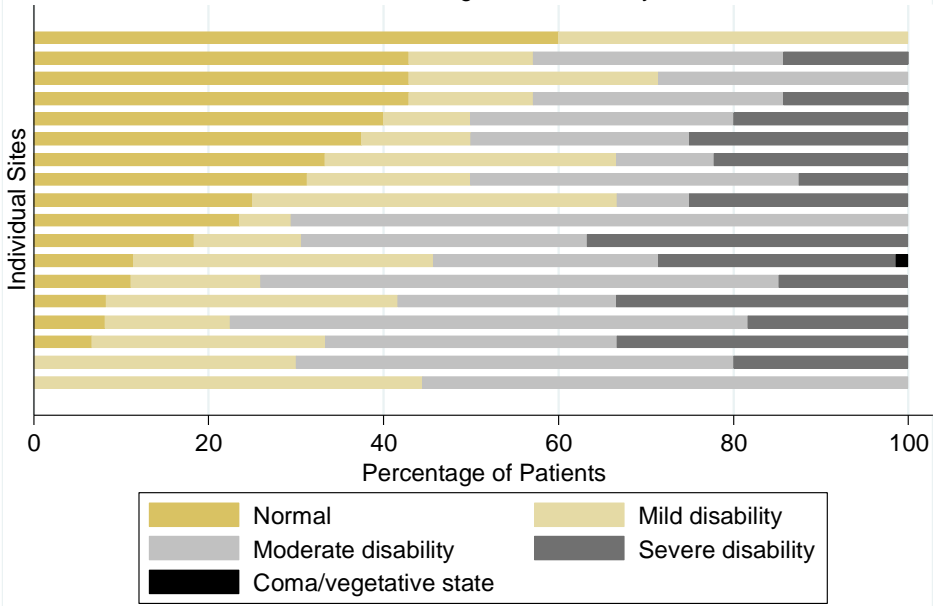

Baseline Pediatric CEREBRAL Performance Categories of Patients Receiving a Tracheostomy Alone

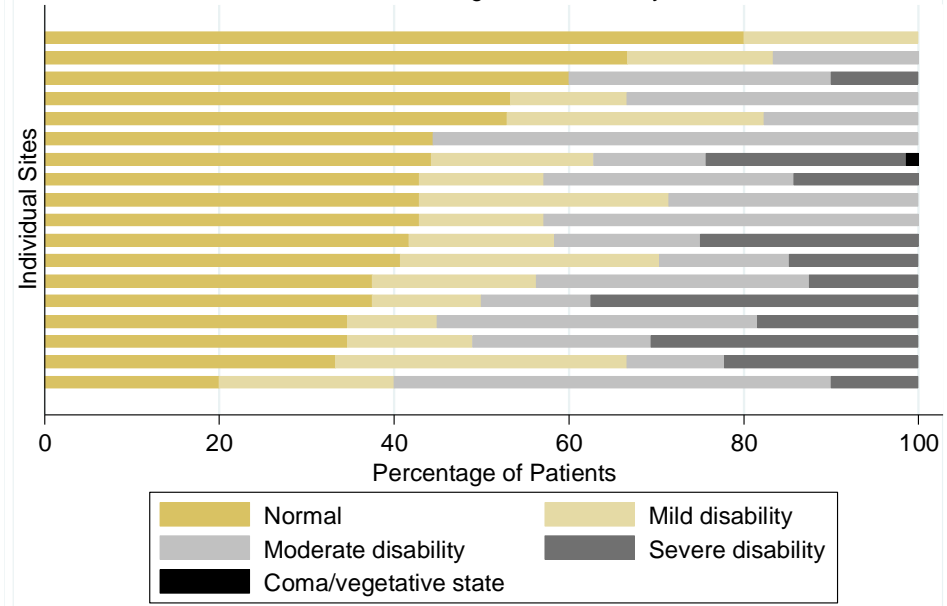

**B**

Baseline Pediatric OVERALL Performance Categories of Patients Initiated on Invasive Ventilation

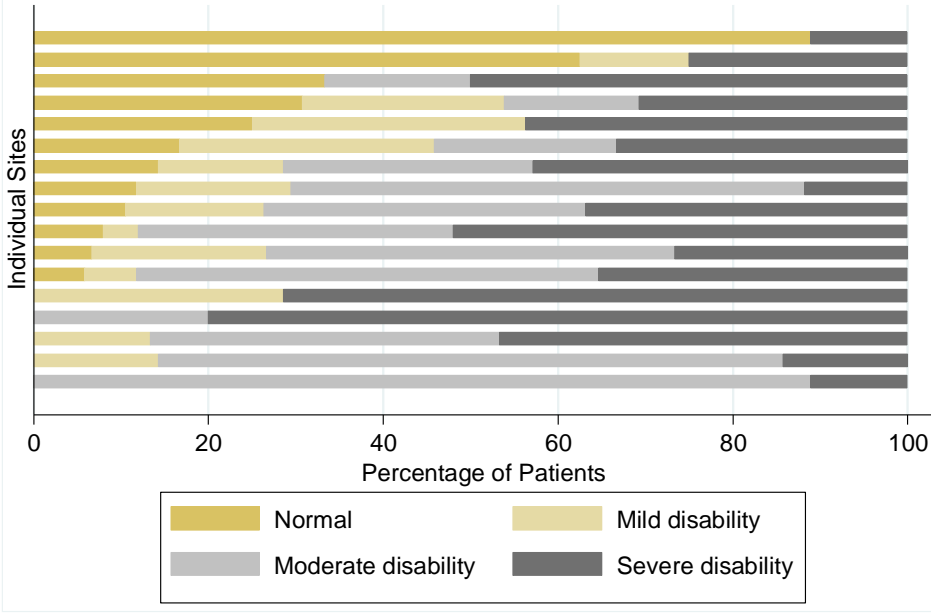

Baseline Pediatric CEREBRAL Performance Categories of Patients Initiated on Invasive Ventilation

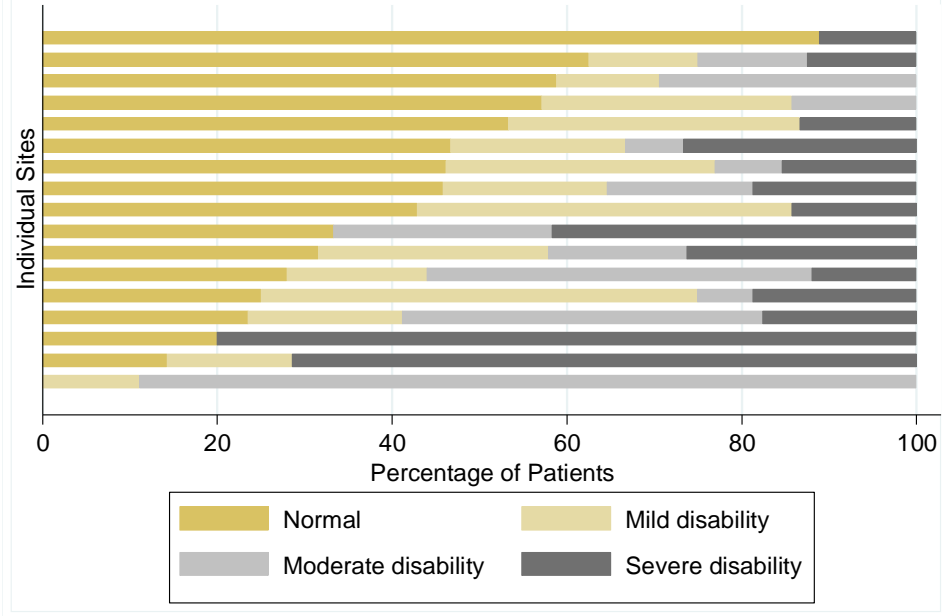

C

Baseline Pediatric OVERALL Performance Categories of Patients Initiated on Noninvasive Ventilation

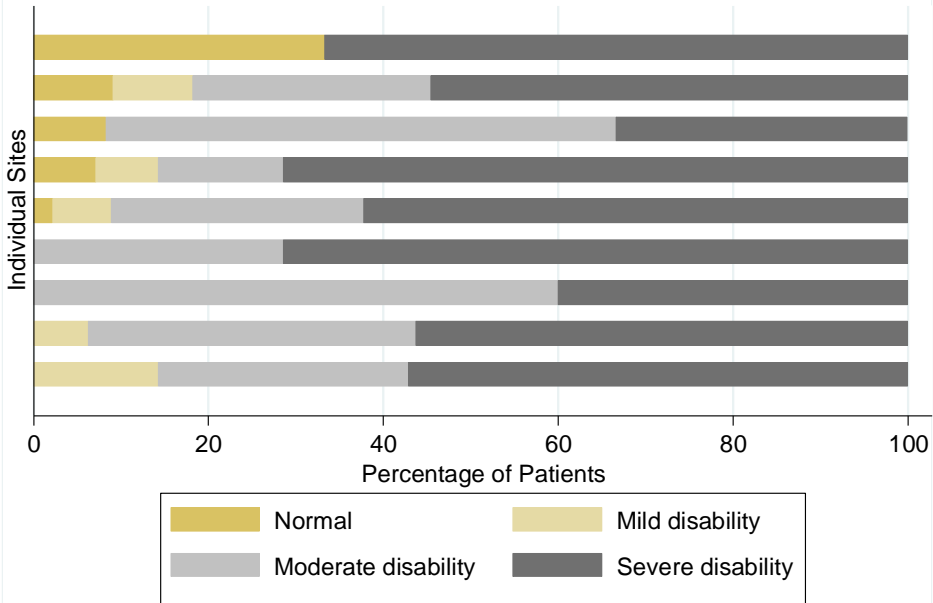

Baseline Pediatric CEREBRAL Performance Categories of Patients Initiated on Noninvasive Ventilation

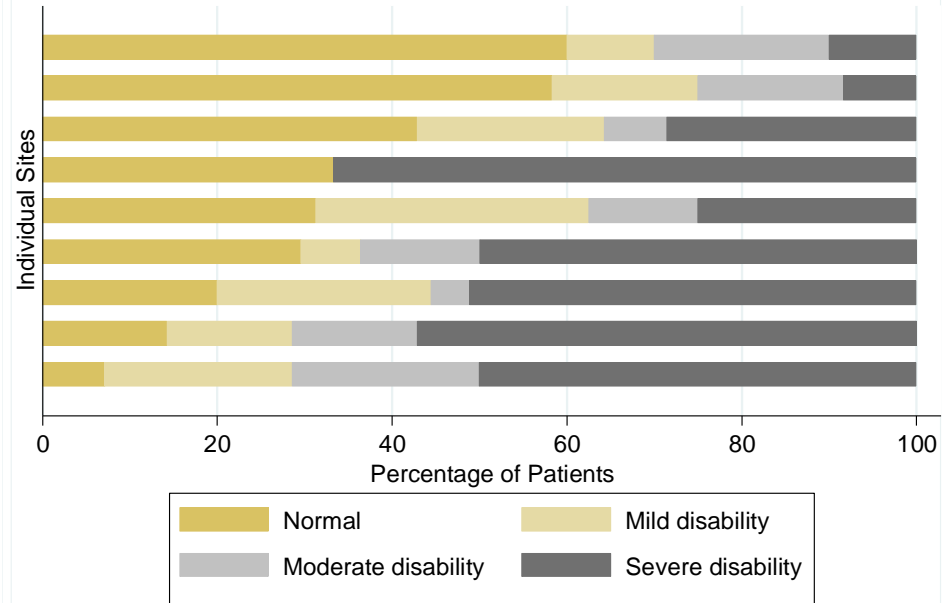

Supplement: NIHMS828090-supplement-Figure_E3_baseline_POPC_PCPC.pdf [file NIHMS828090-supplement-Figure_E3_baseline_POPC_PCPC.pdf]
