# Supplementary material
Source: PubMed Central journal article supplement (PMC5113027)

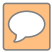

A

Discharge Pediatric OVERALL Performance Categories of Patients Receiving a Tracheostomy Alone

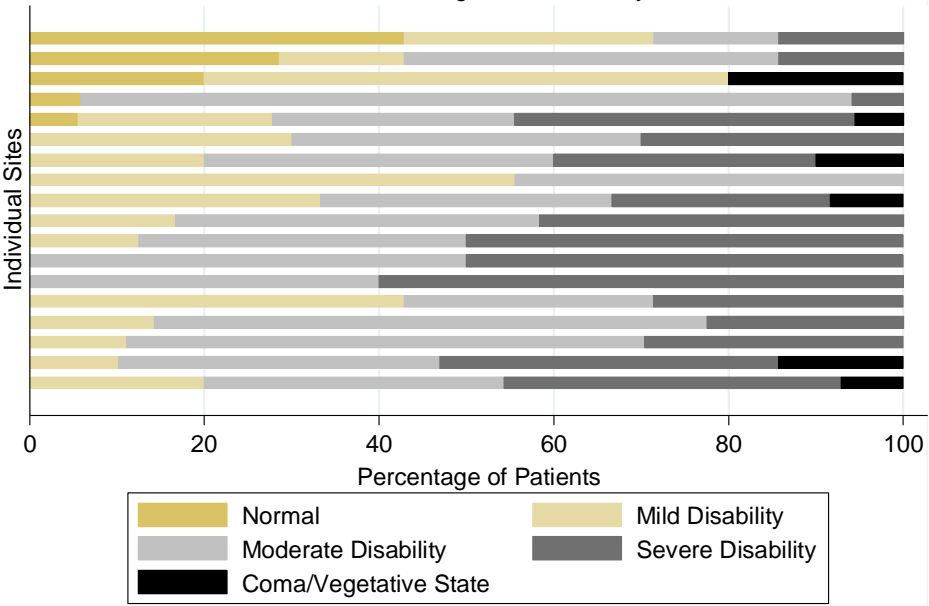

Discharge Pediatric CEREBRAL Performance Categories of Patients Receiving a Tracheostomy Alone

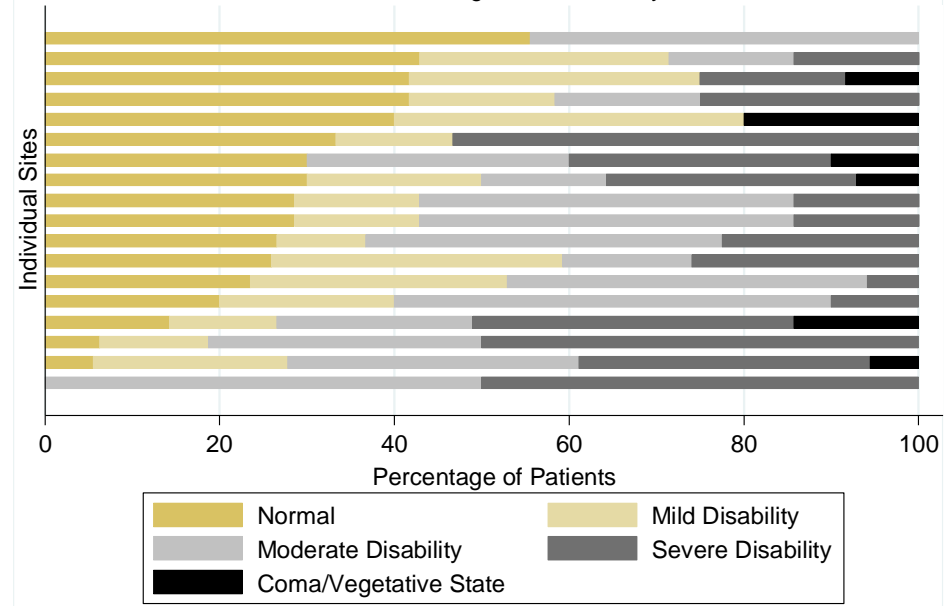



**B**

Discharge Pediatric OVERALL Performance Categories of Patients Initiated on Invasive Ventilation

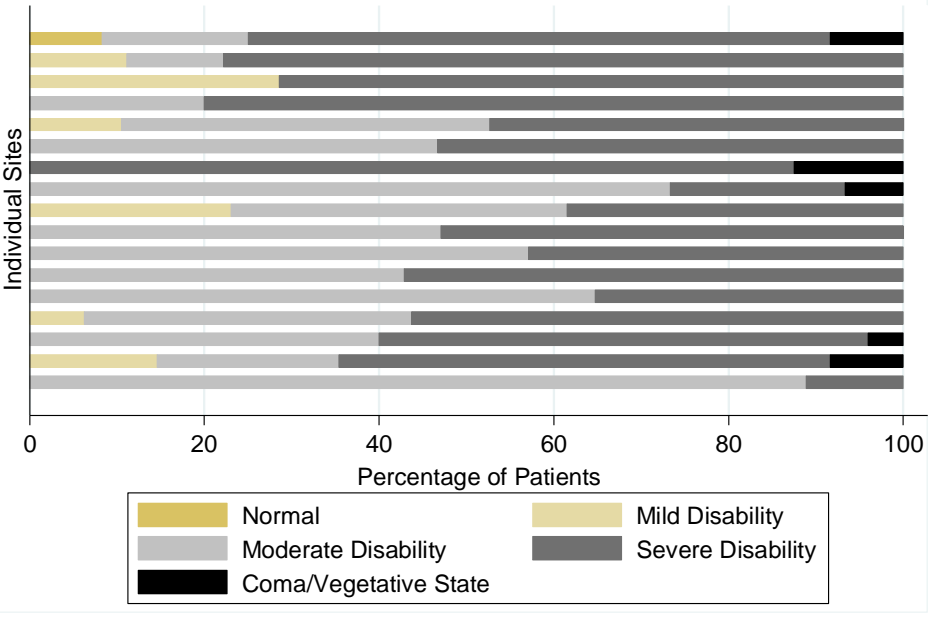

Discharge Pediatric CEREBRAL Performance Categories of Patients Initiated on Invasive Ventilation

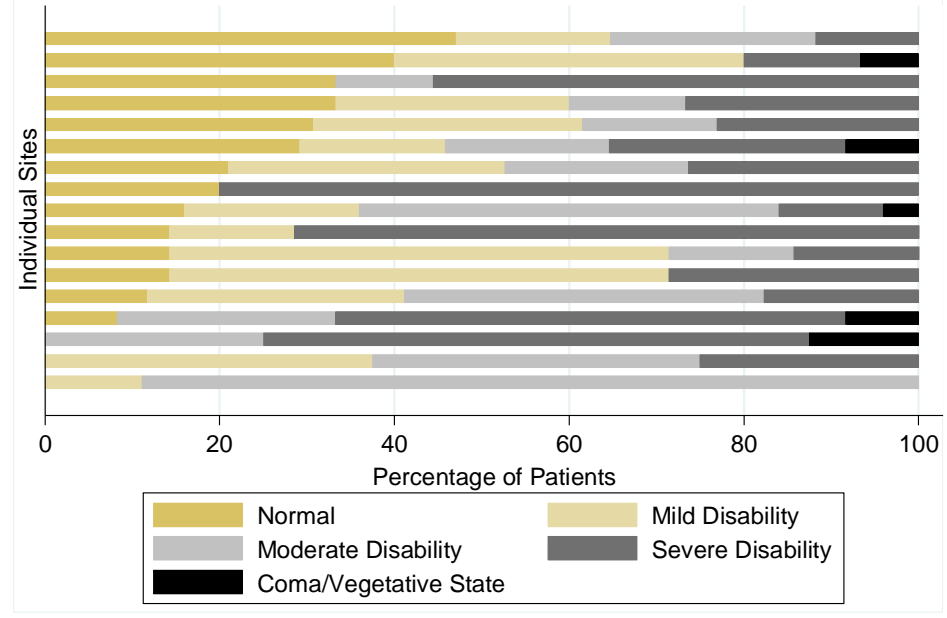



C

Discharge Pediatric OVERALL Performance Categories of Patients Initiated on Noninvasive Ventilation

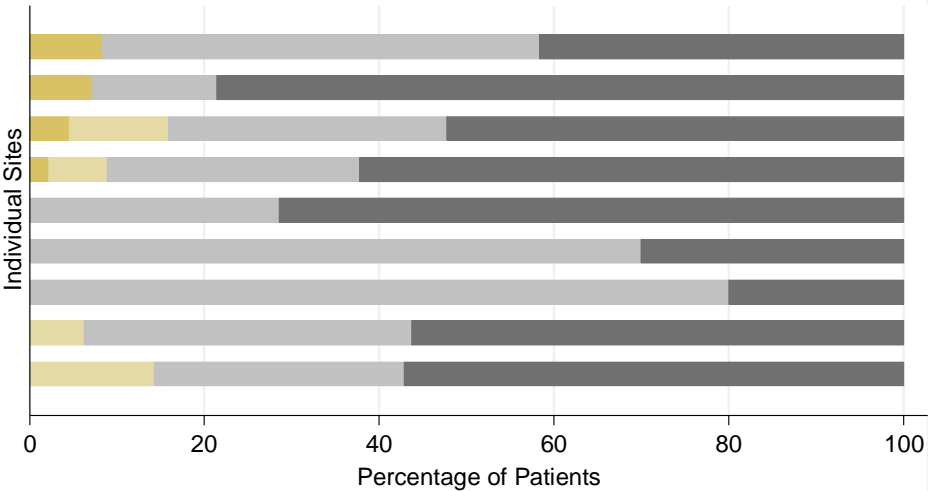

Discharge Pediatric CEREBRAL Performance Categories of Patients Initiated on Noninvasive Ventilation

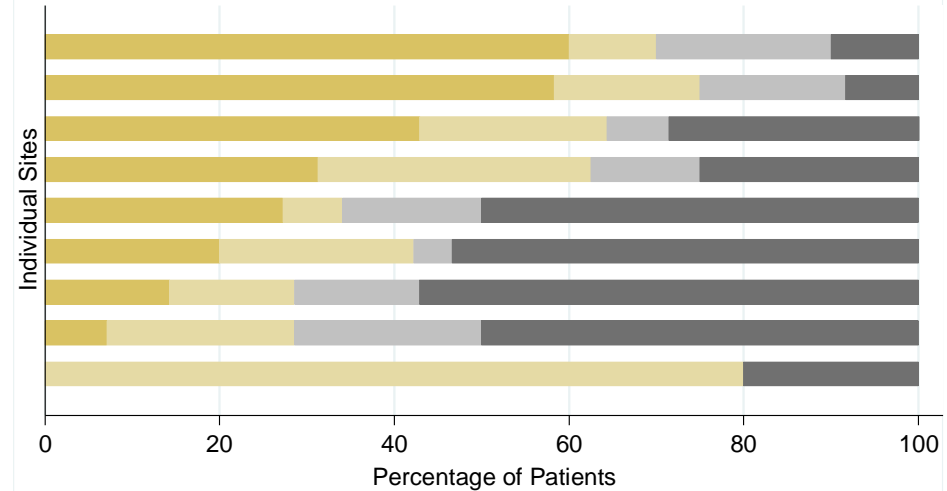

Supplement: NIHMS828090-supplement-Figure_E4_discharge_POPC_PCPC.pdf [file NIHMS828090-supplement-Figure_E4_discharge_POPC_PCPC.pdf]
