# Supplementary material
Source: PubMed Central journal article supplement (PMC5113027)

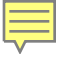

A

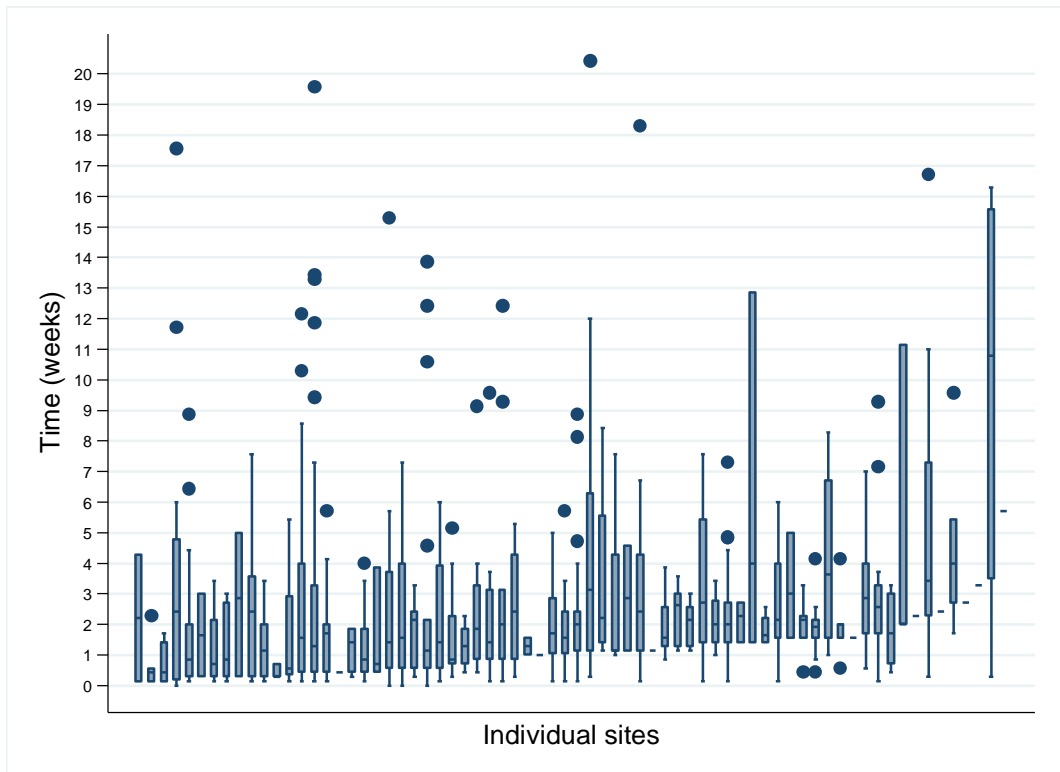

B

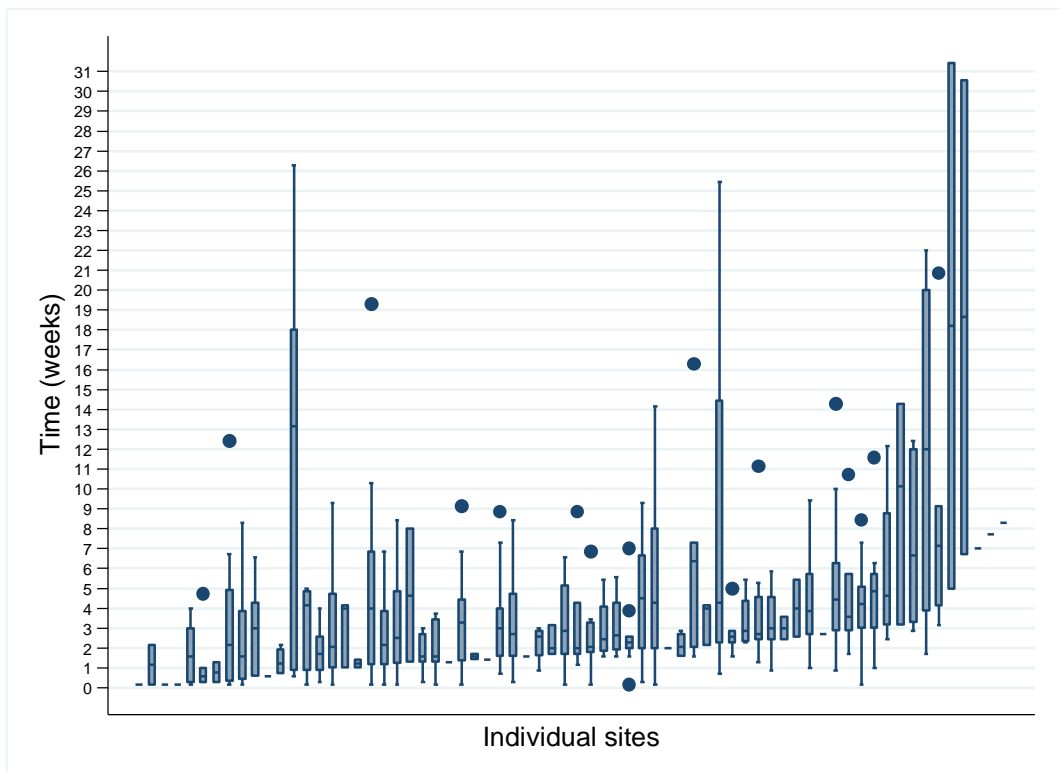

Supplement: NIHMS828090-supplement-Figure_E1_Time_to_trach.pdf [file NIHMS828090-supplement-Figure_E1_Time_to_trach.pdf]

Number of extubations

13  
12  
11  
10  
9  
8  
7  
6  
5  
4  
3  
2  
1

Individual sites

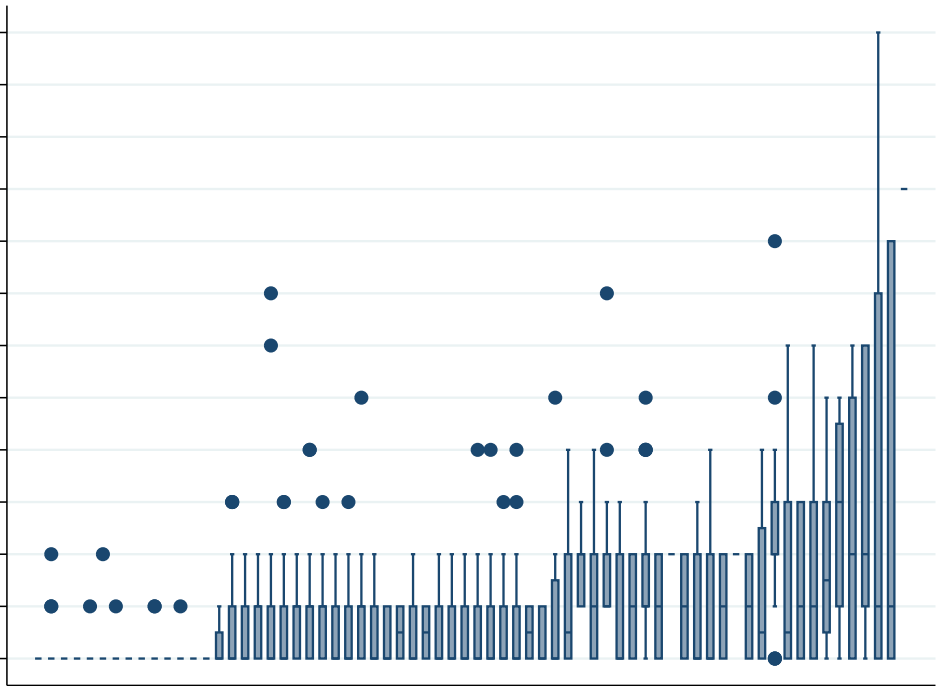

Supplement: NIHMS828090-supplement-Figure_E2_Number_of_extubations.pdf [file NIHMS828090-supplement-Figure_E2_Number_of_extubations.pdf]

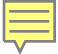

A

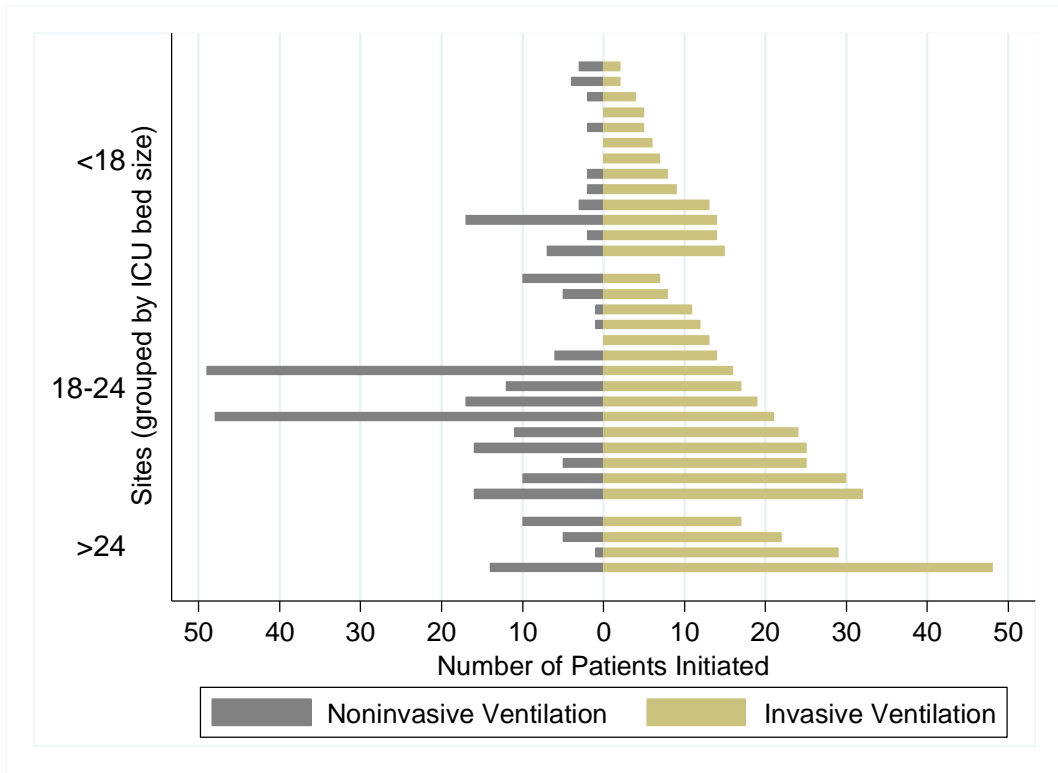

B

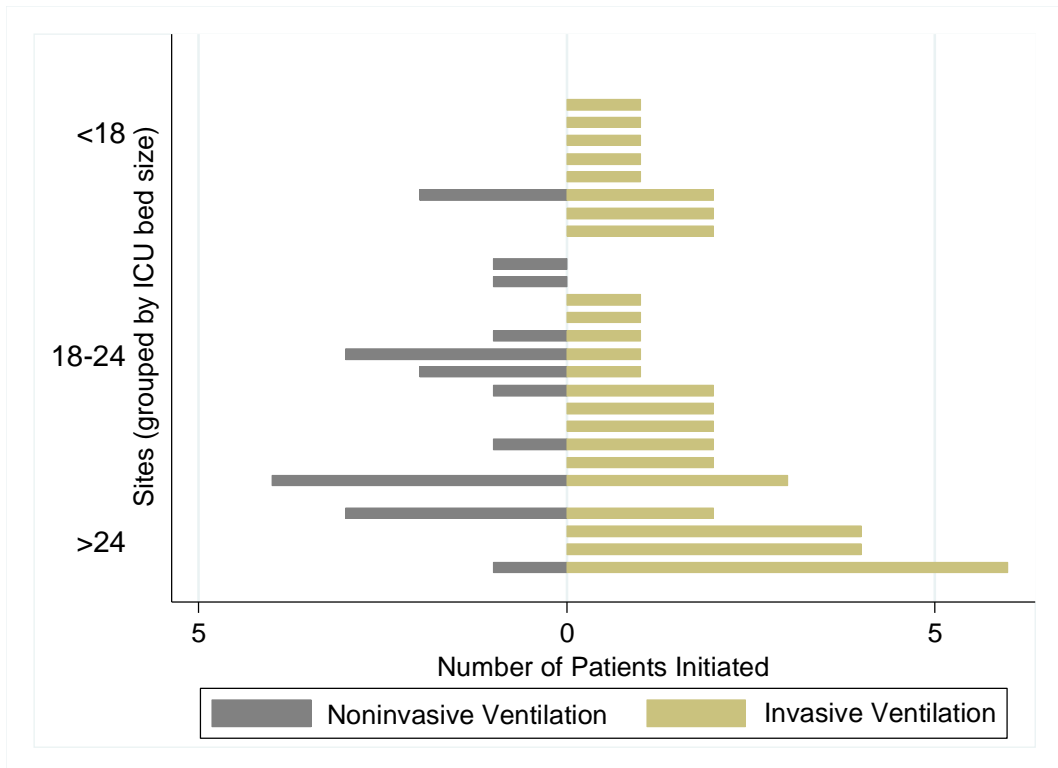

Supplement: NIHMS828090-supplement-Figure_E5_IV_v_NIV.pdf [file NIHMS828090-supplement-Figure_E5_IV_v_NIV.pdf]
